# Supplementary material
Source: publisher figshare collection journal article supplement (https://acs.figshare.com/ndownloader/files/28693503)
Supplement: Supplementary file 1 [file 28693503]

Compound_ID	SMILES	IC50 (GSK-3beta) [µM]	IC50 (NanoBRET GSK-3beta) [µM]
5a	CN(C1CCCN(CCC#N)C1)C2=C3C(NC4=C3C=CC=C4)=NC=N2	0.480 ± 0.076
5b	CN(c2ncnc3[nH]c1cc(F)ccc1c23)C4CCCN(CCC#N)C4	0.973 ± 0.276
1 (= rac-5c)	CN(c2ncnc3[nH]c1cc(Cl)ccc1c23)C4CCCN(CCC#N)C4	0.764 ± 0.203
(R)-5c	CN(c2ncnc3[nH]c1cc(Cl)ccc1c23)[C@@H]4CCCN(CCC#N)C4	0.712 ± 0.176	10.31 ± 1.53
(S)-5c	CN(c2ncnc3[nH]c1cc(Cl)ccc1c23)[C@H]4CCCN(CCC#N)C4	0.489 ± 0.119
5d	CN(c2ncnc3[nH]c1cc(Br)ccc1c23)C4CCCN(CCC#N)C4	0.388 ± 0.080
(R)-5d	CN(c2ncnc3[nH]c1cc(Br)ccc1c23)[C@@H]4CCCN(CCC#N)C4	0.408 ± 0.099
(S)-5d	CN(c2ncnc3[nH]c1cc(Br)ccc1c23)[C@H]4CCCN(CCC#N)C4	0.319 ± 0.066
11	CN(c2ncnc3[nH]c1cc(I)ccc1c23)C4CCCN(CCC#N)C4	1.382 ± 0.394
5g	CN(c2ncnc3[nH]c1ccc(Cl)cc1c23)C4CCCN(CCC#N)C4	3.811 ± 0.118
5h	CN(c2ncnc3[nH]c1ccc(Br)cc1c23)C4CCCN(CCC#N)C4	6.096 ± 0.654
5i	CN(c2ncnc3[nH]c1cccc(Cl)c1c23)C4CCCN(CCC#N)C4	8.042 ± 0.617
5j	Cc4nc(N(C)C1CCCN(CCC#N)C1)c3c2ccc(Cl)cc2[nH]c3n4	>10
5k	CN(c3ncnc4[nH]c2cc(c1ccccc1)ccc2c34)C5CCCN(CCC#N)C5	5.112 ± 0.270
5l	CN(c3ncnc4[nH]c2cc(c1ccco1)ccc2c34)C5CCCN(CCC#N)C5	5.299 ± 0.145
5e	COc1ccc3c(c1)[nH]c4ncnc(N(C)C2CCCN(CCC#N)C2)c34	8.690 ± 0.057
5f	CN(c2ncnc3[nH]c1cc(C(F)(F)F)ccc1c23)C4CCCN(CCC#N)C4	> 10
5m	CN(c2ncnc3[nH]c1cc(C#N)ccc1c23)C4CCCN(CCC#N)C4	1.204 ± 0.146
15	C#Cc1ccc3c(c1)[nH]c4ncnc(N(C)C2CCCN(CCC#N)C2)c34	0.023 ± 0.008
(S)-15	C#Cc1ccc3c(c1)[nH]c4ncnc(N(C)[C@H]2CCCN(CCC#N)C2)c34	0.006 ± 0.003	2.51 ± 0.16
19	N#CCCN5CCC4CCN(c2ncnc3[nH]c1cc(F)ccc1c23)C4C5	2.668 ± 1.488
2	N#CCCN5CCC4CCN(c2ncnc3[nH]c1cc(Cl)ccc1c23)C4C5	0.130 ± 0.008
20	N#CCCN5CCC4CCN(c2ncnc3[nH]c1cc(Br)ccc1c23)C4C5	0.066 ± 0.015	5.27 ± 0.24
21	N#CCCN5CCC4CCN(c2ncnc3[nH]c1cc(I)ccc1c23)C4C5	0.132 ± 0.036
22	C#Cc1ccc4c(c1)[nH]c5ncnc(N3CCC2CCN(CCC#N)CC23)c45	0.002 ± 0.000	2.40 ± 0.017
